# Supplementary material
Source: PubMed Central journal article supplement (PMC3899131)

## **Supplemental Material to:**

**Arindam Das, David A Grotsky, Martin A Neumann,  
Ray Kreienkamp, Ignacio Gonzalez-Suarez,  
Abena B Redwood, Brian K Kennedy, Colin L Stewart,  
and Susana Gonzalo**

**Lamin A  $\Delta$ exon9 mutation leads to telomere and  
chromatin defects but not genomic instability**

**Nucleus 2013; 4(5)**

**<http://dx.doi.org/10.4161/nucl.26873>**

**<http://www.landesbioscience.com/journals/nucleus/article/26873/>**

## **Supplemental Information**

**Supplemental Figure 1.** Western blots showing a marked decrease in levels of Lamins A and C in *Lmna*<sup>A9/A9</sup> immortal mouse embryonic fibroblasts (MEFs).  $\beta$ -Tubulin was used as loading control.

### ***List of antibodies used***

H3K9me3 (#07-442, Upstate)

H4K20me3 (#07-463, Upstate)

$\gamma$ H2AX (#07-164, Millipore)

Lamin A/C (sc-20681, SCBT)

53BP1 (NB100-304, Novus Biological)

53BP1 (H-300: sc-22760, SCBT)

RAD51 (H-92: sc-8349, SCBT)

BRCA1 mouse (sc-135732, SCBT)

CTSL (#C1391, Leinco)

pRb (IF8: sc-318, SCBT)

p130 (C-20: sc-317, SCBT)

p107 (C-18: sc-318, SCBT)

Actin (69100, ImmunO),

$\beta$ -Tubulin (T8238, Sigma Aldrich).

Donkey anti-Rabbit HRP-secondary antibody (ab16284, Abcam)

Bovine anti-Goat HRP-secondary antibody (sc-2352, SCBT)

Goat anti-Mouse HRP-secondary antibody (Thermo Scientific).

### ***List of Taqman conjugated probes for qRT-PCR***

BRCA1 mouse Mm00515386\_m1

CTSL mouse Mm00515597\_m1

53BP1 mouse Mm01271860\_m1

RAD51 mouse Mm00487905\_m1

GAPDH mouse Mm99999915\_g

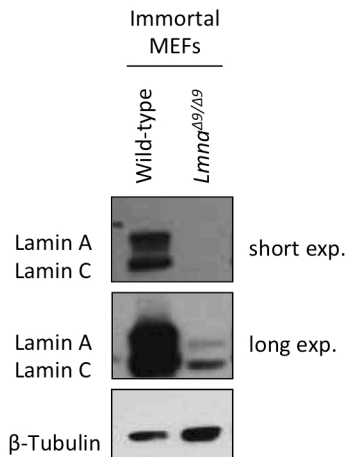

Supplement: nucl-4-410-s01.pdf [file nucl-4-410-s01.pdf]
